# Supplementary material for: Versatility of the bis(iminopyrrolylmethyl)amine ligand: tautomerism, protonation, helical chirality, and the secondary coordination sphere with halogen bonds in the formation of copper(ii) and nickel(ii) complexes
Source: Royal Society of Chemistry journal article supplement (doi:10.1039/d0dt02964e), 2020-01-01
Supplement: d0dt02964e1.pdf [file d0dt02964e1.pdf]

## Supporting Information

Versatility of the bis(iminopyrrolylmethyl)amine ligand: tautomerism, protonation, helical chirality, and secondary coordination sphere with halogen bonds in the formation of copper(II) and nickel(II) complexes

Rajnish Kumar,<sup>a, §</sup> Tapas Guchhait,<sup>a, §</sup> Vasudevan Subramaniyan,<sup>a</sup> Carola Schulzke<sup>b</sup>  
and Ganesan Mani\*<sup>a</sup>

<sup>a</sup>*Department of Chemistry, Indian Institute of Technology Kharagpur, Kharagpur-721 302, India.*

*E-mail: [gmani@chem.iitkgp.ac.in](mailto:gmani@chem.iitkgp.ac.in) ; Fax: +91 3222 282252; Tel: +91 3222 282320*

<sup>b</sup>*Institut für Biochemie, Ernst-Moritz-Arndt Universität Greifswald, Felix-Hausdorff-Straße 4, D-17487 Greifswald, Germany. E-mail: [carola.schulzke@uni-greifswald.de](mailto:carola.schulzke@uni-greifswald.de)*

*§These authors have equal contribution to this work.*

### **Contents**

1. NMR and IR Spectra
2. X-ray Crystallography
3. Mass Spectra
4. DFT Calculation

## 1. NMR and IR Spectra

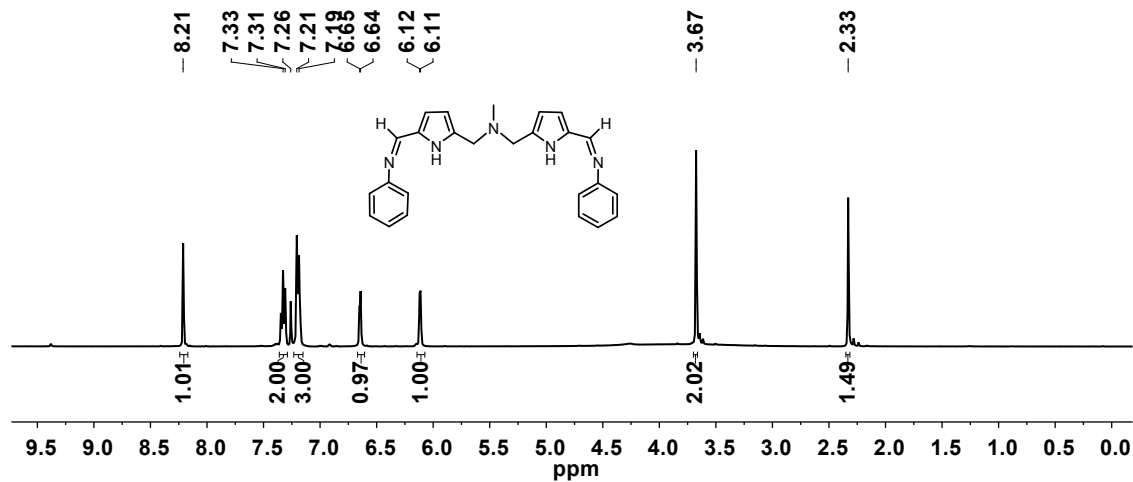

Figure S1:  $^1H$  NMR spectrum of  $H_2L2$  in  $CDCl_3$ .

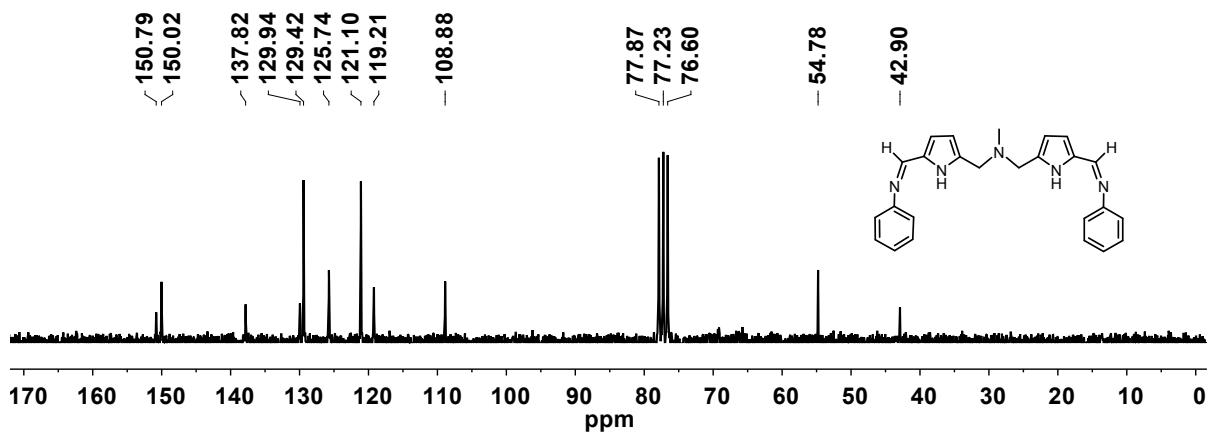

Figure S2:  $^{13}C\{^1H\}$  NMR spectrum of  $H_2L2$  in  $CDCl_3$ .

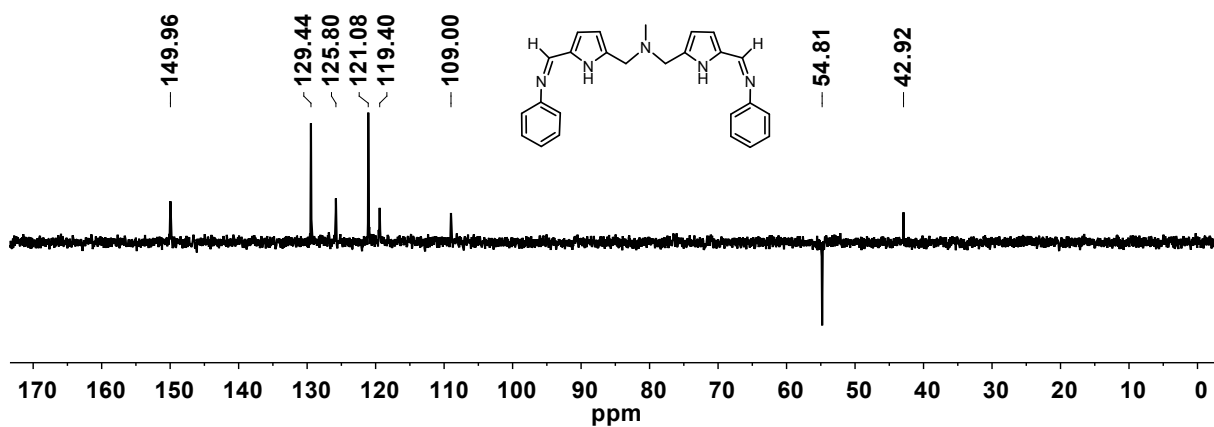

Figure S3: DEPT-135  $\{^1\text{H}\}$  NMR spectrum of  $\text{H}_2\text{L}_2$  in  $\text{CDCl}_3$ .

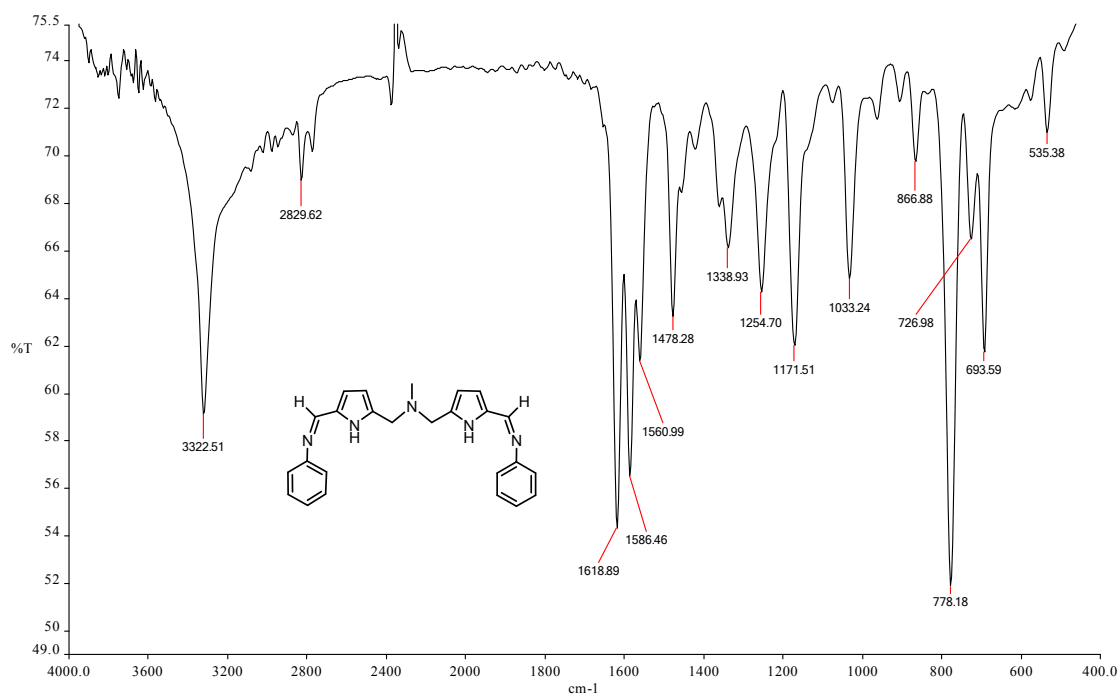

Figure S4: FTIR spectrum of  $\text{H}_2\text{L}_2$  recorded as a KBr disc.

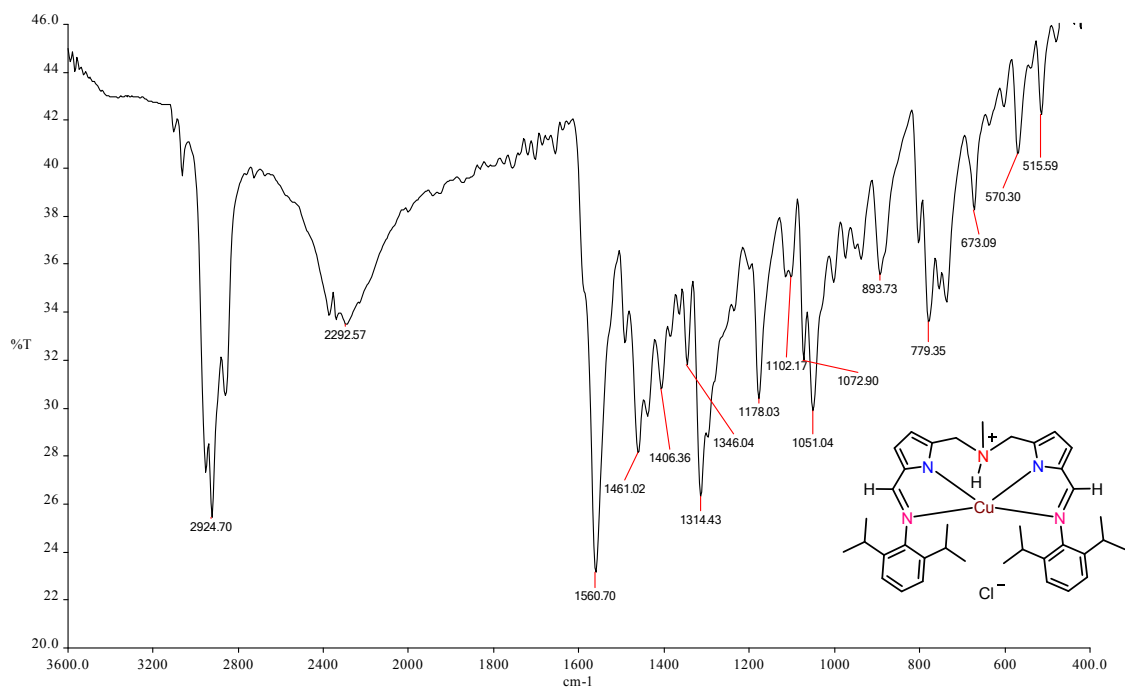

**Figure S5:** FTIR spectrum of the complex **1** recorded as a KBr disc.

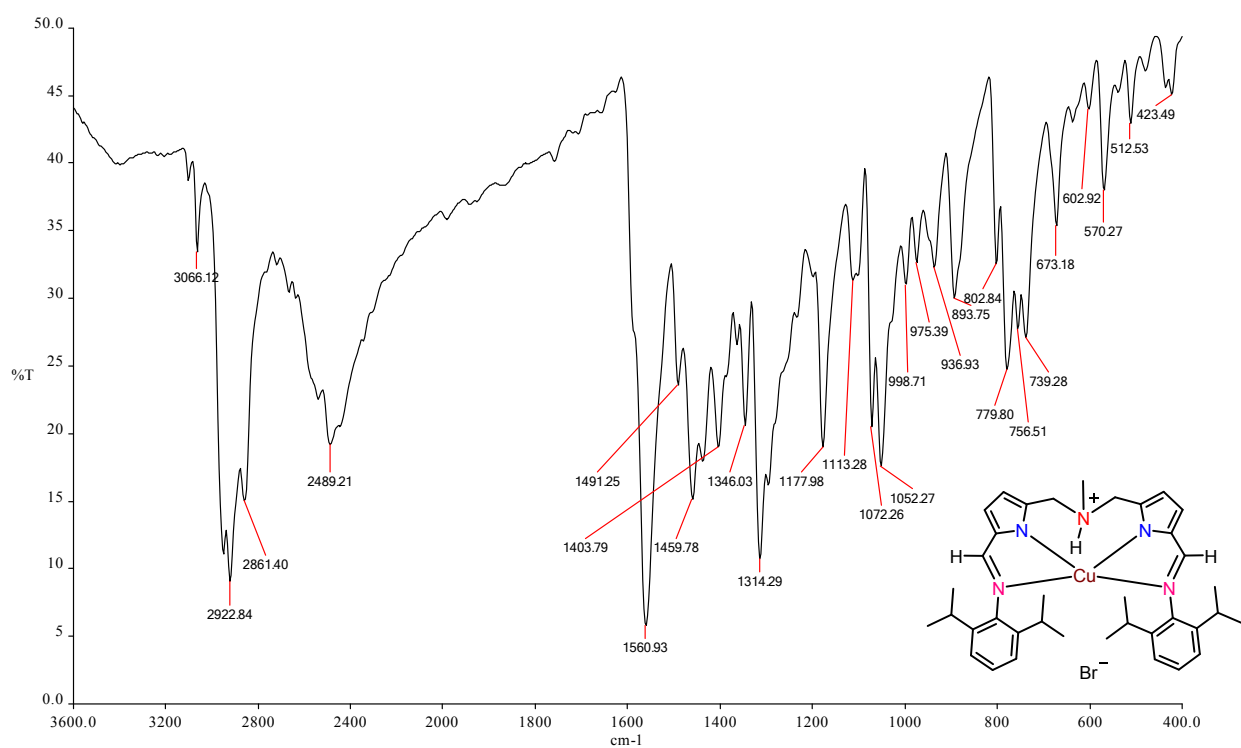

**Figure S6:** FTIR spectrum of complex **2** recorded as a KBr disc.

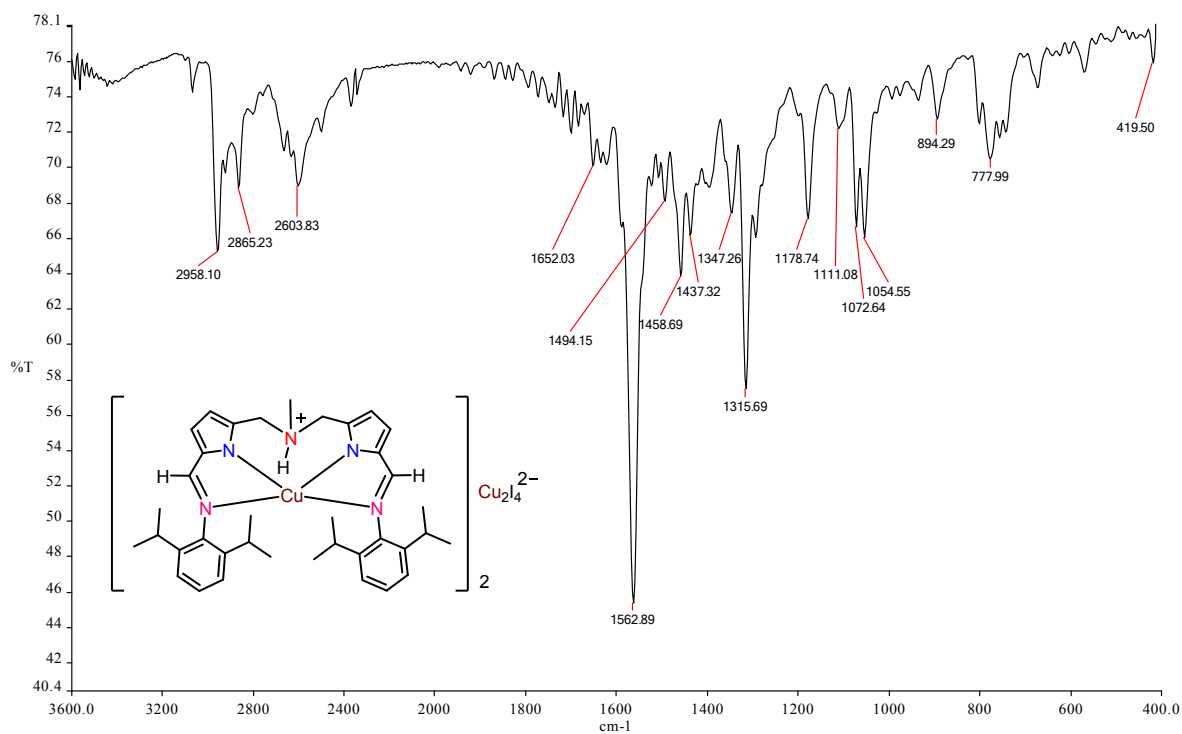

**Figure S7:** FTIR spectrum of the cationic complex **3** recorded as a KBr disc.

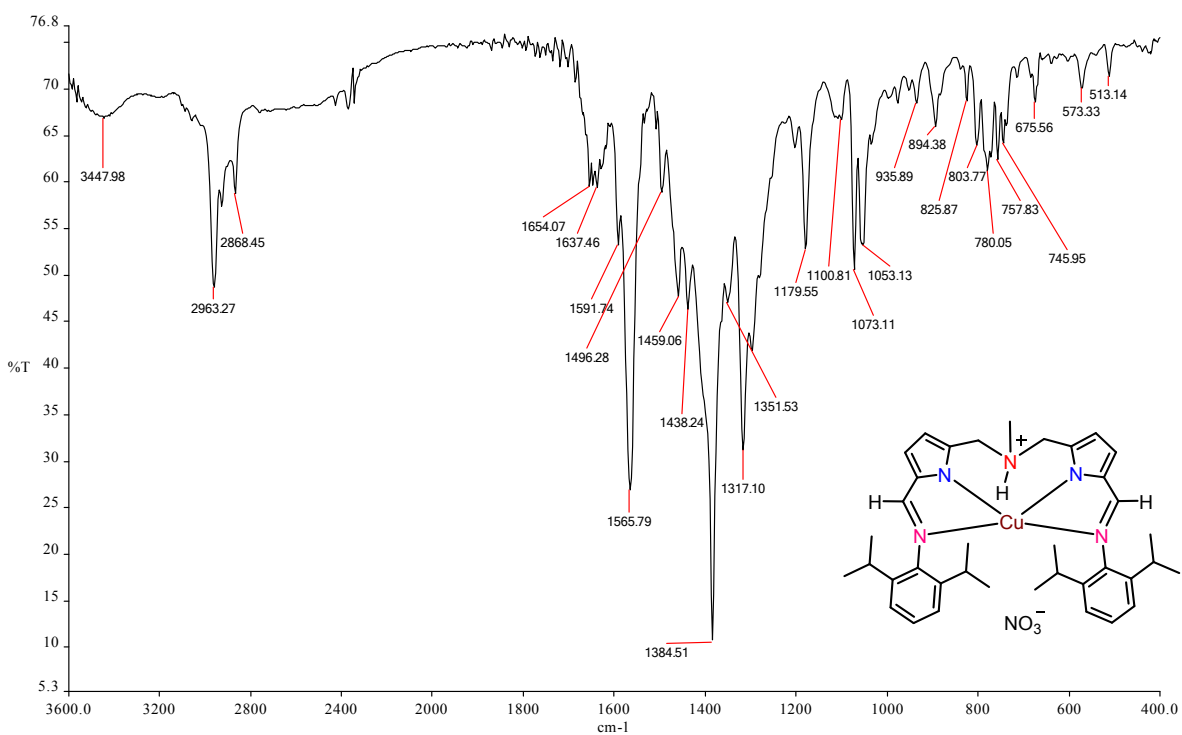

**Figure S8:** FTIR spectrum of the complex **4** recorded as a KBr disc.

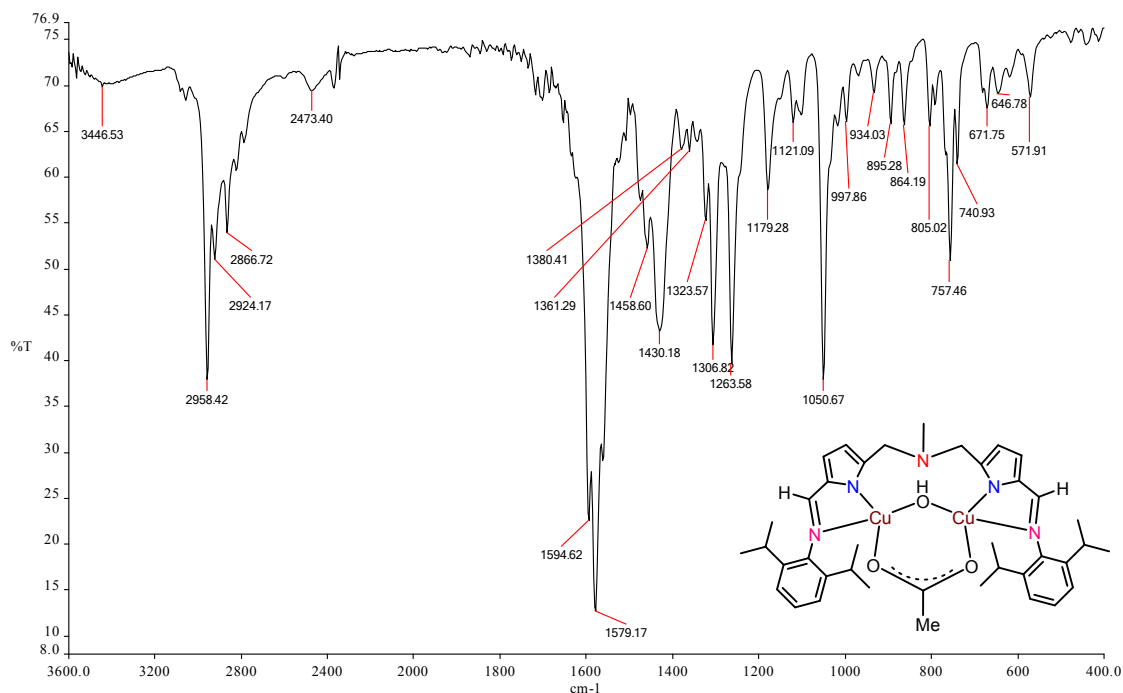

**Figure S9:** FTIR spectrum of the complex **5** recorded as a KBr disc.

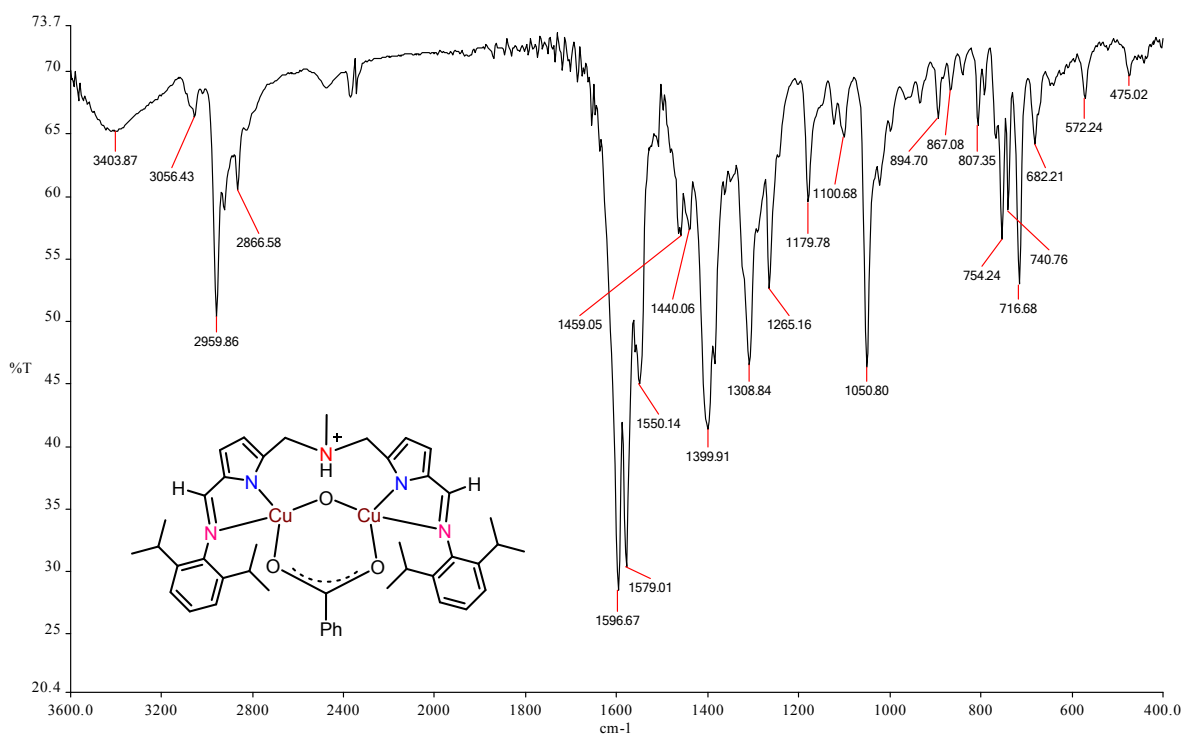

**Figure S10:** FTIR spectrum of the complex **6** recorded as a KBr disc.

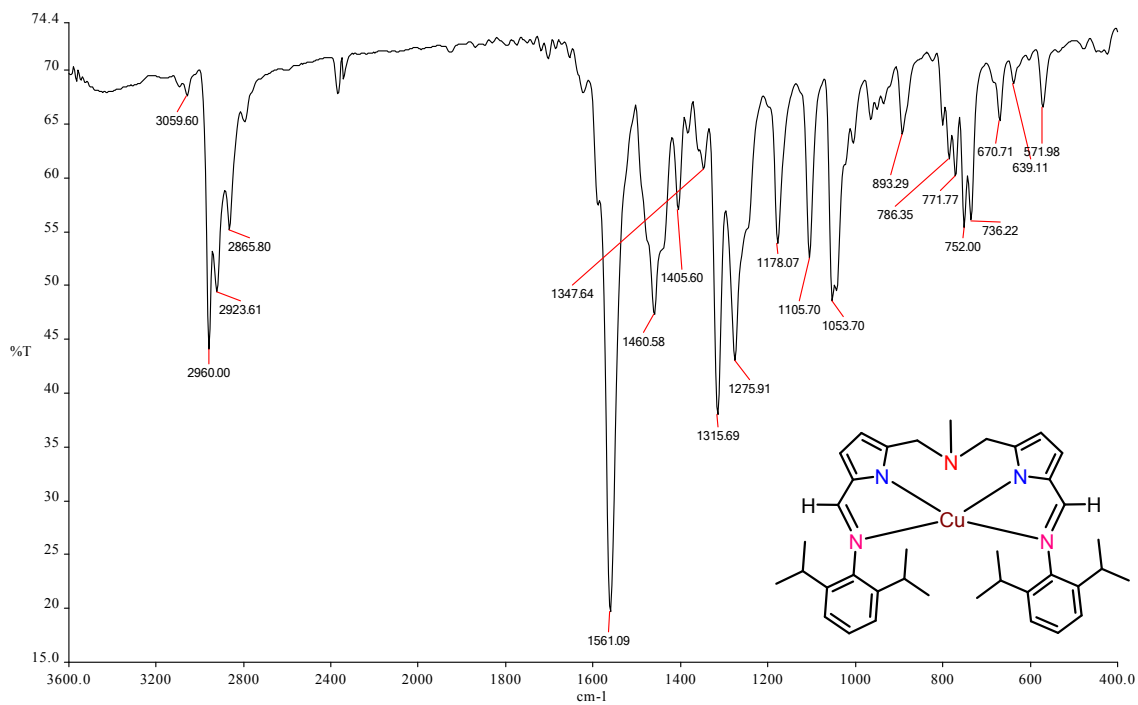

**Figure S11:** FTIR spectrum of the complex **7** recorded as a KBr disc.

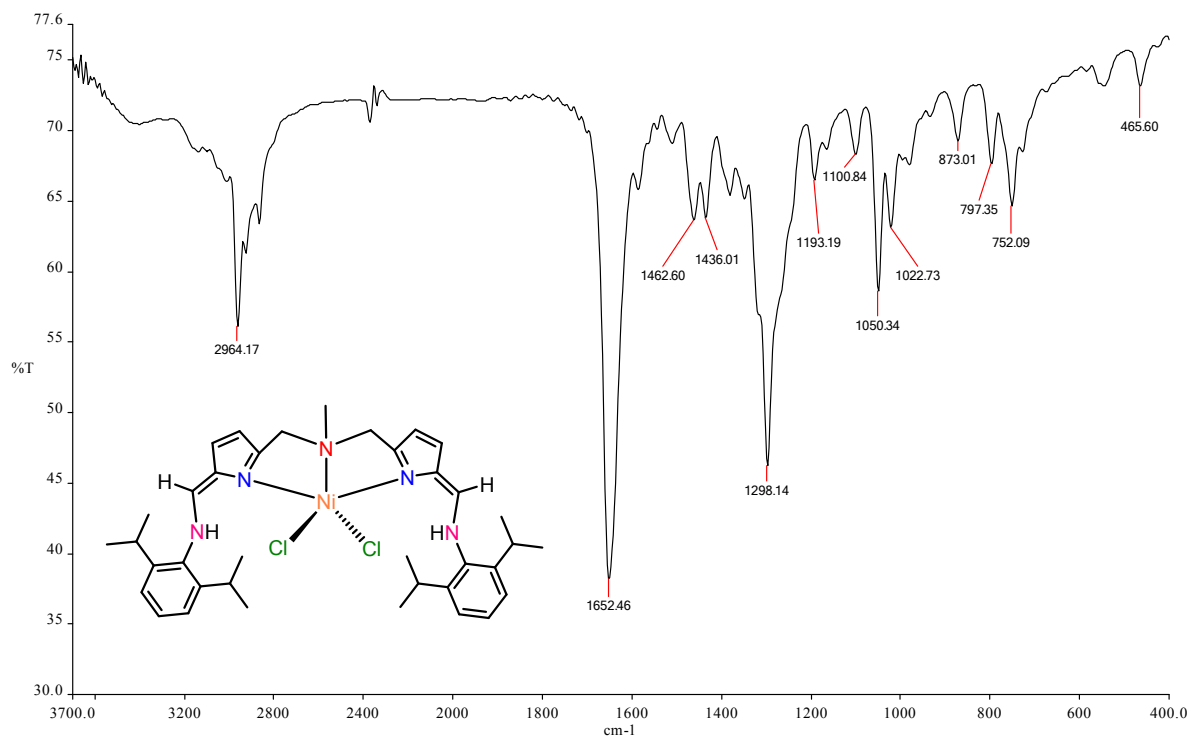

**Figure S12:** FTIR spectrum of the complex **8** recorded as a KBr disc.

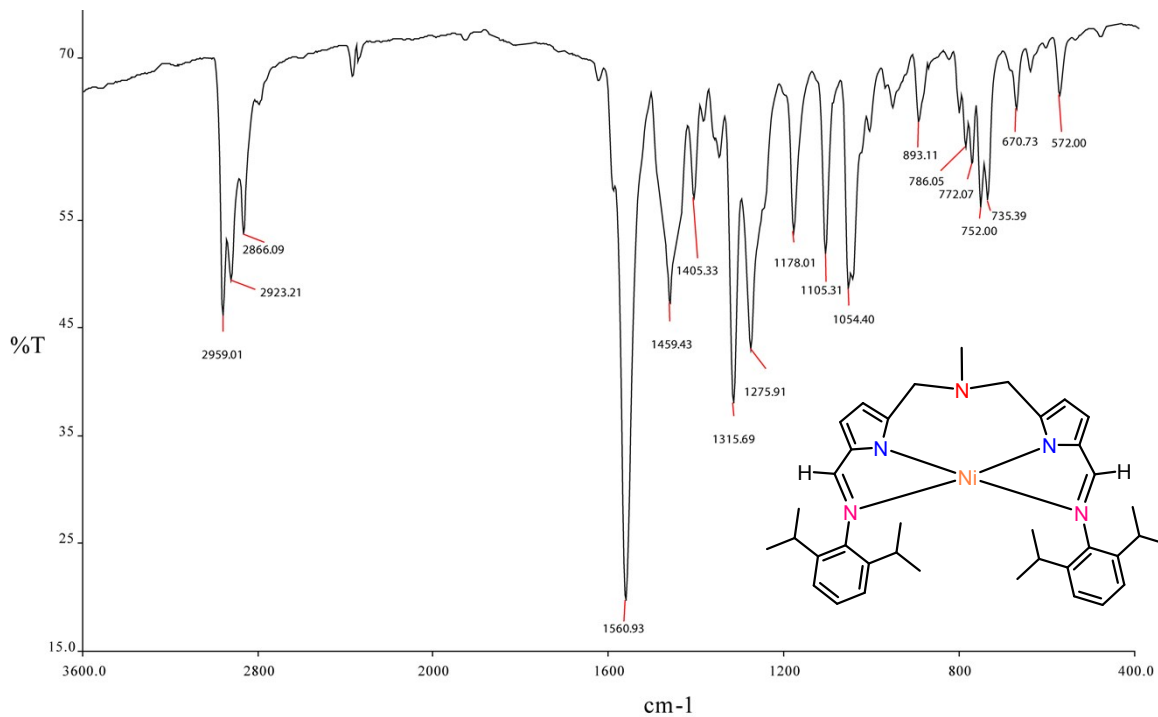

**Figure S13:** FTIR spectrum of the complex **9** recorded as a KBr disc.

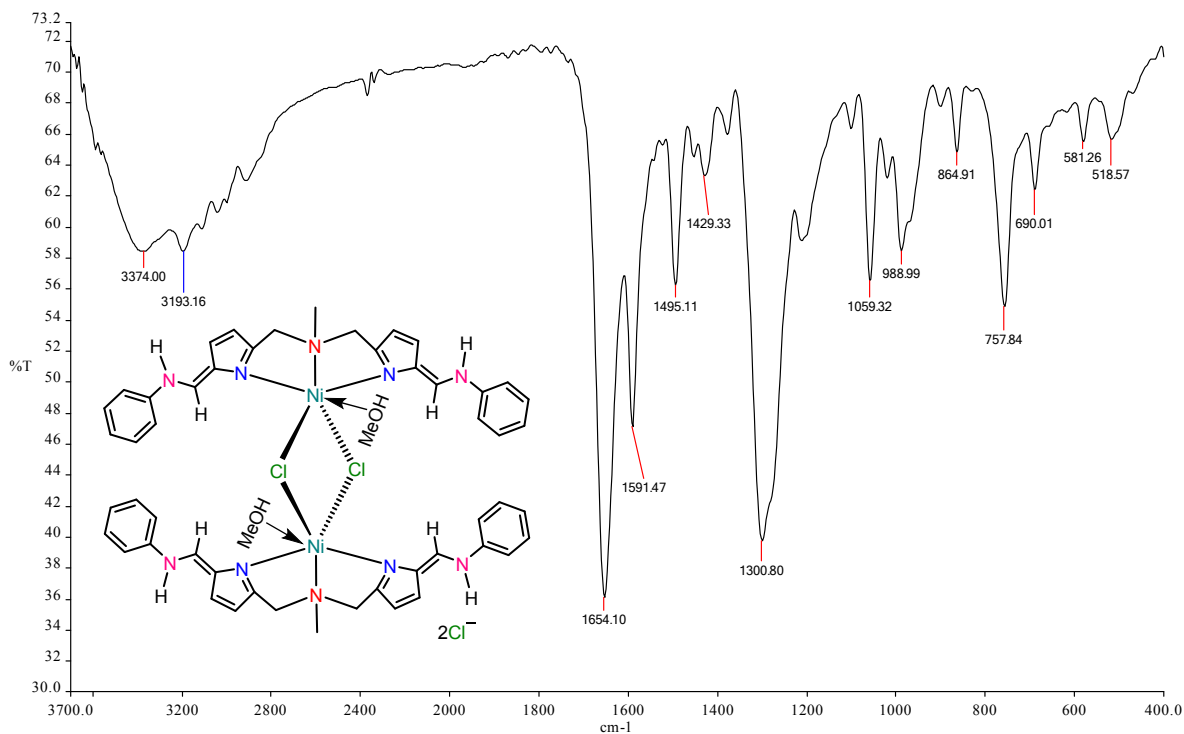

**Figure S14:** FTIR spectrum of the complex **10** recorded as a KBr disc.



## 2. X-ray Crystallography

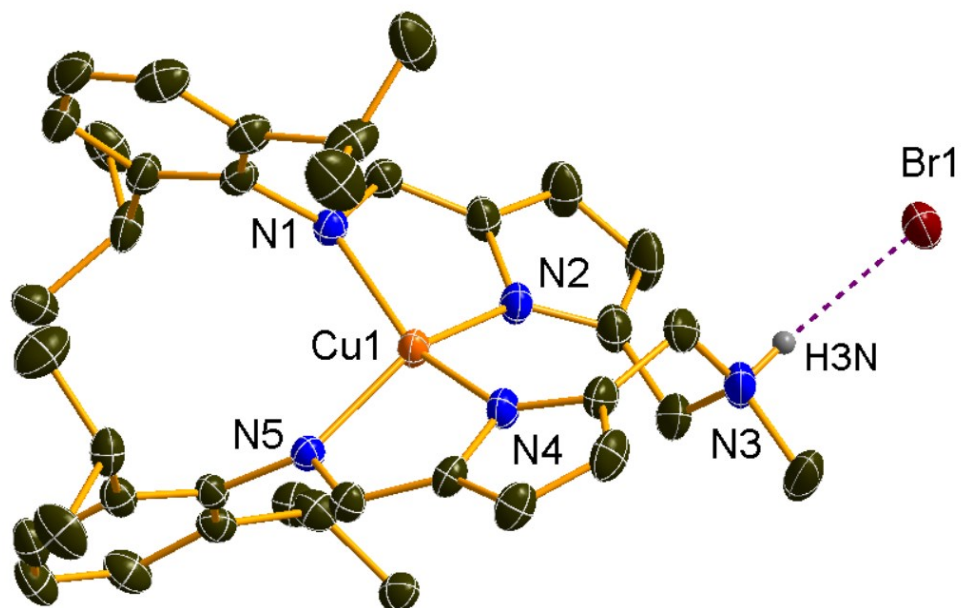

**Figure S15:** The molecular structure (30% probability ellipsoids) of the cationic copper(II) complex, **2**. Hydrogen atoms except the ammonium hydrogen are omitted for clarity. Selected bond lengths [Å] and angles [°]: N1–Cu1 2.022(3), N2–Cu1 1.927(3), N4–Cu1 1.935(3), N5–Cu1 2.034(3), N3···Br1 3.131(3), N1–Cu1–N2 82.77(12), N1–Cu1–N4 151.09(12), N2–Cu1–N5 152.44(12), N2–Cu1–N4 101.29(12), N4–Cu1–N5 82.71(11), N1–Cu1–N5, 106.95(11), N3–H3N···Br1 160.00(4). Symmetry transformations used to generate equivalent atoms: (i)  $x+1, y, z$ , (ii)  $x+1, y+1, z$ , (iii)  $x, y+1, z$ , (iv)  $-x+1, -y+1, -z$ .

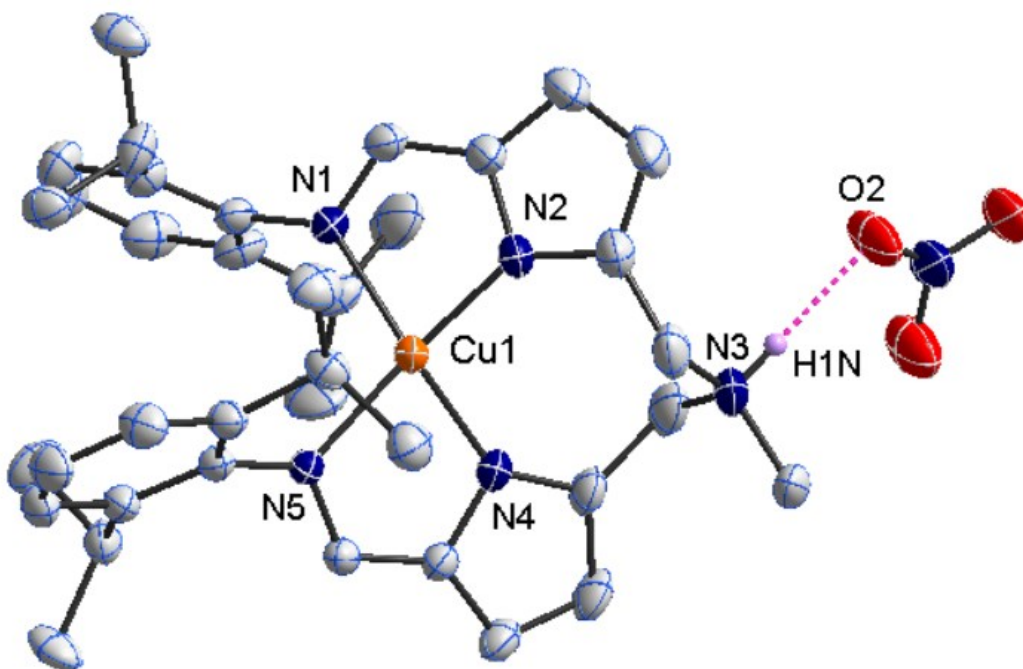

**Figure S16:** The molecular structure (30% probability ellipsoids) of the cationic copper(II) complex, **4**. Hydrogen atoms except the ammonium hydrogen are omitted for clarity. Selected bond lengths [ $\text{\AA}$ ] and angles [ $^\circ$ ]: N1–Cu1 2.017(3), N2–Cu1 1.920(3), N4–Cu1 1.933(3), N5–Cu1 2.029(3), N1–Cu1–N2 82.83(12), N1–Cu1–N4 150.85(12), N2–Cu1–N5 153.43(11), N2–Cu1–N4 101.27(12), N4–Cu1–N5 82.64(11), N1–Cu1–N5 106.62(10). Symmetry transformations used to generate equivalent atoms: (i)  $-x+1, -y+1, -z+1$ .

**Table S1.** Crystallographic data for the complexes **1-10**.

|                                                      | <b>1</b>                                                      | <b>2</b>                                                      | <b>3·(MeCN)<sub>0.5</sub></b>                                                       |
|------------------------------------------------------|---------------------------------------------------------------|---------------------------------------------------------------|-------------------------------------------------------------------------------------|
| Empirical formula                                    | C <sub>37</sub> H <sub>48</sub> N <sub>5</sub> CuCl           | C <sub>37</sub> H <sub>48</sub> N <sub>5</sub> CuBr           | C <sub>77</sub> H <sub>100.5</sub> N <sub>11.5</sub> Cu <sub>4</sub> I <sub>4</sub> |
| CCDC number                                          | 2017163                                                       | 2017164                                                       | 2017165                                                                             |
| Formula weight                                       | 661.79                                                        | 706.25                                                        | 1928.42                                                                             |
| Wavelength (Å)                                       | 0.71073                                                       | 0.71073                                                       | 0.71073                                                                             |
| Temperature (K)                                      | 293(2)                                                        | 293(2)                                                        | 293(2)                                                                              |
| Crystal system                                       | Triclinic                                                     | Triclinic                                                     | Triclinic                                                                           |
| Color and shape                                      | Dark Green, prism                                             | Dark Green, prism                                             | Dark Green, prism                                                                   |
| Space group                                          | <i>P</i> $\bar{1}$                                            | <i>P</i> $\bar{1}$                                            | <i>P</i> $\bar{1}$                                                                  |
| <i>a</i> /Å                                          | 8.9926(17)                                                    | 9.013(2)                                                      | 10.7497(11)                                                                         |
| <i>b</i> /Å                                          | 10.728(2)                                                     | 10.769(3)                                                     | 17.8050(19)                                                                         |
| <i>c</i> /Å                                          | 19.132(4)                                                     | 19.466(5)                                                     | 23.571(3)                                                                           |
| <i>α</i> /degree                                     | 75.068(5)                                                     | 75.451(5)                                                     | 67.868(3)                                                                           |
| <i>β</i> /degree                                     | 82.409(5)                                                     | 82.408(6)                                                     | 85.450(5)                                                                           |
| <i>γ</i> /degree                                     | 86.015(6)                                                     | 86.125(6)                                                     | 87.076(4)                                                                           |
| Volume (Å <sup>3</sup> )                             | 1766.5(6)                                                     | 1811.6(7)                                                     | 4164.8(8)                                                                           |
| <i>Z</i>                                             | 2                                                             | 2                                                             | 2                                                                                   |
| <i>D</i> <sub>calcd</sub> , g cm <sup>-3</sup>       | 1.244                                                         | 1.295                                                         | 1.538                                                                               |
| <i>μ</i> /mm <sup>-1</sup>                           | 0.726                                                         | 1.737                                                         | 2.535                                                                               |
| <i>F</i> (000)                                       | 702                                                           | 738                                                           | 1920                                                                                |
| Crystal size/mm                                      | 0.45×0.25×0.16                                                | 0.33×0.25×0.16                                                | 0.19×0.15×0.12                                                                      |
| <i>θ</i> range (degree)                              | 1.109 to 24.211                                               | 1.955 to 24.999                                               | 0.935 to 25.610                                                                     |
| Limiting indices                                     | -10≤ <i>h</i> ≤10,<br>-12≤ <i>k</i> ≤12,<br>-20≤ <i>l</i> ≤22 | -10≤ <i>h</i> ≤10,<br>-12≤ <i>k</i> ≤12,<br>-20≤ <i>l</i> ≤23 | -13≤ <i>h</i> ≤13,<br>-21≤ <i>k</i> ≤21, -28≤ <i>l</i> ≤28                          |
| Total/ unique no. of reflns.                         | 19707 / 5665                                                  | 20485 / 6327                                                  | 51199 / 15356                                                                       |
| <i>R</i> <sub>int</sub>                              | 0.0330                                                        | 0.0503                                                        | 0.0621                                                                              |
| Data / restr./ params.                               | 5665 / 0 / 401                                                | 6327 / 0 / 400                                                | 15356 / 102 / 930                                                                   |
| GOF ( <i>F</i> <sup>2</sup> )                        | 1.026                                                         | 1.037                                                         | 1.018                                                                               |
| <i>RI</i> , <i>wR2</i>                               | 0.0382, 0.0939                                                | 0.0417, 0.0963                                                | 0.0529, 0.1359                                                                      |
| R indices (all data) <i>RI</i> , <i>wR2</i>          | 0.0500, 0.1012                                                | 0.0748, 0.1119                                                | 0.1205, 0.1720                                                                      |
| Largest different peak and hole (e Å <sup>-3</sup> ) | 0.395 and -0.342                                              | 0.772 and -0.633                                              | 0.540 and -1.093                                                                    |

|                                                      | <b>4</b>                                                         | <b>5·CHCl<sub>3</sub></b>                                                                     | <b>6·CH<sub>3</sub>OH</b>                                                     |
|------------------------------------------------------|------------------------------------------------------------------|-----------------------------------------------------------------------------------------------|-------------------------------------------------------------------------------|
| Empirical formula                                    | C <sub>37</sub> H <sub>48</sub> N <sub>6</sub> O <sub>3</sub> Cu | C <sub>40</sub> H <sub>52</sub> N <sub>5</sub> Cu <sub>2</sub> O <sub>3</sub> Cl <sub>3</sub> | C <sub>45</sub> H <sub>57</sub> N <sub>5</sub> Cu <sub>2</sub> O <sub>4</sub> |
| CCDC number                                          | 2017166                                                          | 2017167                                                                                       | 2017168                                                                       |
| Formula weight                                       | 688.35                                                           | 884.29                                                                                        | 859.03                                                                        |
| Wavelength (Å)                                       | 0.71073                                                          | 0.71073                                                                                       | 0.71073                                                                       |
| Temperature (K)                                      | 293(2)                                                           | 293(2)                                                                                        | 293(2)                                                                        |
| Crystal system                                       | Triclinic                                                        | Hexagonal                                                                                     | Hexagonal                                                                     |
| Color and shape                                      | Dark Green, prism                                                | Dark Green, needle                                                                            | Dark Green, prism                                                             |
| Space group                                          | <i>P</i> $\bar{1}$                                               | <i>P</i> 6(3)/ <i>m</i>                                                                       | <i>P</i> 6(3)/ <i>m</i>                                                       |
| <i>a</i> /Å                                          | 8.955(3)                                                         | 17.4202(9)                                                                                    | 17.5728(4)                                                                    |
| <i>b</i> /Å                                          | 10.717(4)                                                        | 17.4202(9)                                                                                    | 17.5728(4)                                                                    |
| <i>c</i> /Å                                          | 20.003(7)                                                        | 25.141(3)                                                                                     | 25.5032(13)                                                                   |
| <i>α</i> /degree                                     | 76.137(10)                                                       | 90.00                                                                                         | 90.00                                                                         |
| <i>β</i> /degree                                     | 82.087(11)                                                       | 90.00                                                                                         | 90.00                                                                         |
| <i>γ</i> /degree                                     | 85.491(10)                                                       | 120.00                                                                                        | 120.00                                                                        |
| Volume (Å <sup>3</sup> )                             | 1843.9(11)                                                       | 6607.1(9)                                                                                     | 6820.4(5)                                                                     |
| <i>Z</i>                                             | 2                                                                | 6                                                                                             | 6                                                                             |
| <i>D</i> <sub>calcd</sub> , g cm <sup>-3</sup>       | 1.240                                                            | 1.333                                                                                         | 1.255                                                                         |
| <i>μ</i> /mm <sup>-1</sup>                           | 0.635                                                            | 1.188                                                                                         | 0.980                                                                         |
| <i>F</i> (000)                                       | 730                                                              | 2760                                                                                          | 2712                                                                          |
| Crystal size/mm                                      | 0.43×0.34×0.14                                                   | 0.18×0.14×0.09                                                                                | 0.23×0.21×0.15                                                                |
| <i>θ</i> range (degree)                              | 1.056 to 24.948                                                  | 2.109 to 24.998                                                                               | 2.084 to 26.044                                                               |
| Limiting indices                                     | -10≤ <i>h</i> ≤10,<br>-12≤ <i>k</i> ≤12,<br>-23≤ <i>l</i> ≤23    | -20≤ <i>h</i> ≤20,<br>-20≤ <i>k</i> ≤20,<br>-29≤ <i>l</i> ≤29                                 | -21≤ <i>h</i> ≤21,<br>-21≤ <i>k</i> ≤21,<br>-31≤ <i>l</i> ≤31                 |
| Total/ unique no. of reflns.                         | 21655 / 6401                                                     | 79907 / 3983                                                                                  | 110153 / 4619                                                                 |
| <i>R</i> <sub>int</sub>                              | 0.0383                                                           | 0.1325                                                                                        | 0.0523                                                                        |
| Data / restr./ params.                               | 6401 / 0 / 428                                                   | 3983 / 7 / 264                                                                                | 4619 / 39 / 291                                                               |
| GOF ( <i>F</i> <sup>2</sup> )                        | 1.022                                                            | 1.015                                                                                         | 1.062                                                                         |
| <i>RI</i> , <i>wR2</i>                               | 0.0501, 0.1250                                                   | 0.0583, 0.1494                                                                                | 0.0671, 0.2084                                                                |
| R indices (all data) <i>RI</i> , <i>wR2</i>          | 0.0742, 0.1395                                                   | 0.1058, 0.1809                                                                                | 0.0843, 0.2362                                                                |
| Largest different peak and hole (e Å <sup>-3</sup> ) | 0.592 and -0.313                                                 | 0.687 and -0.957                                                                              | 2.241 and -0.676                                                              |

|                                                      | 7·CH <sub>3</sub> OH                                          | 8                                                                 | 9                                                             |
|------------------------------------------------------|---------------------------------------------------------------|-------------------------------------------------------------------|---------------------------------------------------------------|
| Empirical formula                                    | C <sub>38</sub> H <sub>51</sub> N <sub>5</sub> OCu            | C <sub>37</sub> H <sub>49</sub> N <sub>5</sub> Cl <sub>2</sub> Ni | C <sub>37</sub> H <sub>47</sub> N <sub>5</sub> Ni             |
| CCDC number                                          | 2017169                                                       | 2017170                                                           | 2017171                                                       |
| Formula weight                                       | 657.37                                                        | 693.42                                                            | 620.50                                                        |
| Wavelength (Å)                                       | 0.71073                                                       | 0.71073                                                           | 0.71073                                                       |
| Temperature (K)                                      | 293(2)                                                        | 293(2)                                                            | 293(2)                                                        |
| Crystal system                                       | Triclinic                                                     | Triclinic                                                         | Triclinic                                                     |
| Color and shape                                      | Dark Green, prism                                             | Yellow, needle                                                    | Yellow, needle                                                |
| Space group                                          | $P\bar{1}$                                                    | $P\bar{1}$                                                        | $P\bar{1}$                                                    |
| <i>a</i> /Å                                          | 10.1009(10)                                                   | 10.9516(5)                                                        | 12.096(2)                                                     |
| <i>b</i> /Å                                          | 10.6823(11)                                                   | 11.4362(5)                                                        | 13.620(2)                                                     |
| <i>c</i> /Å                                          | 19.141(2)                                                     | 16.4132(7)                                                        | 21.043(3)                                                     |
| <i>α</i> /degree                                     | 82.590(3)                                                     | 75.1680(10)                                                       | 87.403(5)                                                     |
| <i>β</i> /degree                                     | 85.574(3)                                                     | 80.0740(10)                                                       | 81.329(5)                                                     |
| <i>γ</i> /degree                                     | 63.203(3)                                                     | 68.8550(10)                                                       | 87.201(6)                                                     |
| Volume (Å <sup>3</sup> )                             | 1827.7(3)                                                     | 1846.06(14)                                                       | 4496.4(5)                                                     |
| <i>Z</i>                                             | 2                                                             | 2                                                                 | 4                                                             |
| <i>D</i> <sub>calcd</sub> , g cm <sup>-3</sup>       | 1.195                                                         | 1.247                                                             | 1.205                                                         |
| <i>μ</i> /mm <sup>-1</sup>                           | 0.632                                                         | 0.702                                                             | 0.599                                                         |
| <i>F</i> (000)                                       | 702                                                           | 736                                                               | 1328                                                          |
| Crystal size/mm                                      | 0.52×0.33×0.13                                                | 0.13×0.06×0.04                                                    | 0.26×0.21×0.18                                                |
| <i>θ</i> range (degree)                              | 1.073 to 24.995                                               | 1.953 to 24.735                                                   | 0.980 to 25.000                                               |
| Limiting indices                                     | -11≤ <i>h</i> ≤11,<br>-11≤ <i>k</i> ≤12,<br>-22≤ <i>l</i> ≤22 | -12≤ <i>h</i> ≤12,<br>-13≤ <i>k</i> ≤12,<br>-19≤ <i>l</i> ≤19     | -14≤ <i>h</i> ≤14,<br>-16≤ <i>k</i> ≤16,<br>-23≤ <i>l</i> ≤25 |
| Total/ unique no. of reflns.                         | 21694 / 6358                                                  | 20395 / 6144                                                      | 11909 / 11909                                                 |
| <i>R</i> <sub>int</sub>                              | 0.0606                                                        | 0.0583                                                            | <i>hklf</i> 5                                                 |
| Data / restr./ params.                               | 6358 / 0 / 411                                                | 6144 / 0 / 414                                                    | 11909 / 134 / 794                                             |
| GOF ( <i>F</i> <sup>2</sup> )                        | 1.072                                                         | 1.010                                                             | 1.053                                                         |
| <i>RI</i> , <i>wR2</i>                               | 0.0596, 0.1446                                                | 0.0385, 0.0881                                                    | 0.0686, 0.1454                                                |
| R indices (all data) <i>RI</i> , <i>wR2</i>          | 0.0970, 0.1641                                                | 0.0630, 0.0996                                                    | 0.1323, 0.1826                                                |
| Largest different peak and hole (e Å <sup>-3</sup> ) | 0.853 and -0.317                                              | 0.429 and -0.540                                                  | 0.720 and -0.966                                              |

---

|                                                         |                                                |
|---------------------------------------------------------|------------------------------------------------|
| Empirical formula                                       | $C_{52}H_{58}N_{10}O_2Cl_4Ni_2$                |
| CCDC number                                             | 2017172                                        |
| Formula weight                                          | 1114.30                                        |
| Wavelength (Å)                                          | 0.71073                                        |
| Temperature (K)                                         | 293(2)                                         |
| Crystal system                                          | Monoclinic                                     |
| Color and shape                                         | Brown, prism                                   |
| Space group                                             | $P2(1)/c$                                      |
| $a/\text{Å}$                                            | 11.73(2)                                       |
| $b/\text{Å}$                                            | 23.36(5)                                       |
| $c/\text{Å}$                                            | 11.47(2)                                       |
| $\alpha/\text{degree}$                                  | 90.00                                          |
| $\beta/\text{degree}$                                   | 93.73(3)                                       |
| $\gamma/\text{degree}$                                  | 90.00                                          |
| Volume (Å <sup>3</sup> )                                | 3136(11)                                       |
| $Z$                                                     | 2                                              |
| $D_{\text{calcd}}$ , g cm <sup>-3</sup>                 | 1.180                                          |
| $\mu/\text{mm}^{-1}$                                    | 0.813                                          |
| $F(000)$                                                | 1160                                           |
| Crystal size/mm                                         | 0.21×0.15×0.10                                 |
| $\theta$ range (degree)                                 | 1.740 to 24.921                                |
| Limiting indices                                        | -13≤ $h$ ≤13,<br>-27≤ $k$ ≤26,<br>-12≤ $l$ ≤13 |
| Total/ unique no. of reflns.                            | 20017 / 5302                                   |
| $R_{\text{int}}$                                        | 0.0939                                         |
| Data / restr./ params.                                  | 5302 / 0 / 320                                 |
| GOF ( $F^2$ )                                           | 0.979                                          |
| $RI$ , $wR2$                                            | 0.0634, 0.1649                                 |
| R indices (all data) $RI$ ,<br>$wR2$                    | 0.1171, 0.1997                                 |
| Largest different peak<br>and hole (e Å <sup>-3</sup> ) | 0.806 and -0.549                               |

---

### 3. Mass Spectra

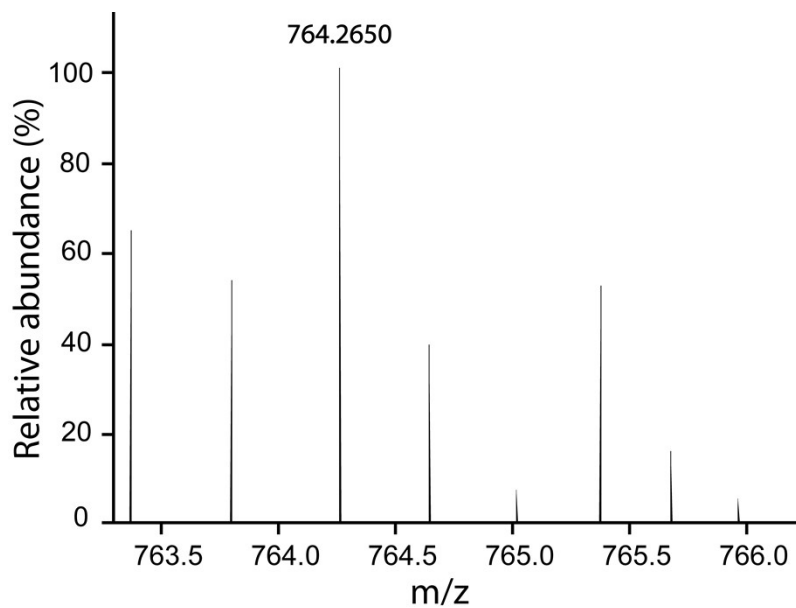

**Figure S17:** Portion of ESI(+)-MS spectrum of **5**, showing [**5** + H]<sup>+</sup> peak.

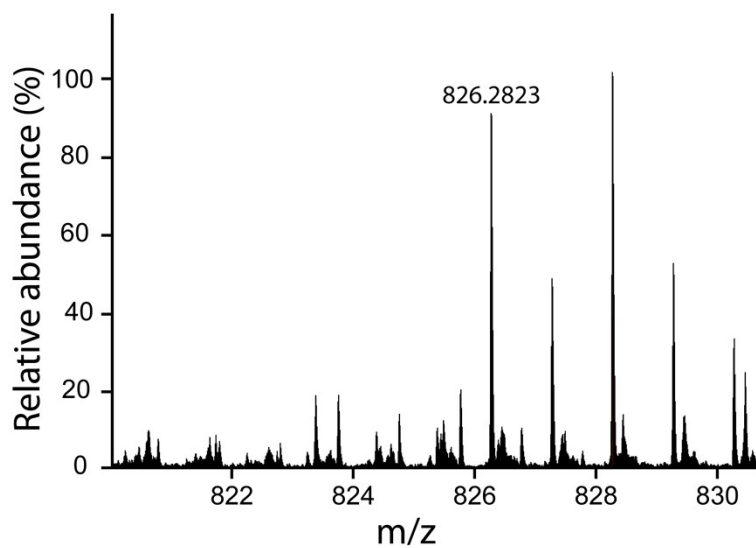

**Figure S18:** Portion of ESI(+)-MS spectrum of **6**, showing [**6** + H]<sup>+</sup> peak.

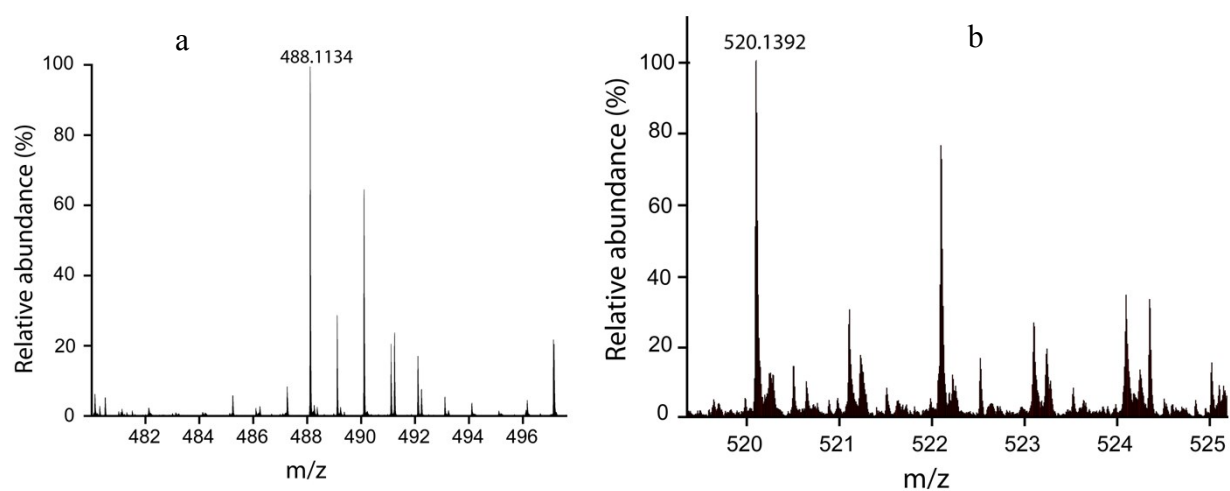

**Figure S19:** Portions of ESI(+)-MS spectrum of **10**, showing (a)  $[\mathbf{10} - 2\text{Cl} - 2\text{MeOH}]^{2+}$  and (b)  $[\mathbf{10} - 2\text{Cl}]^{2+}$  peaks.

#### 4. DFT Calculation

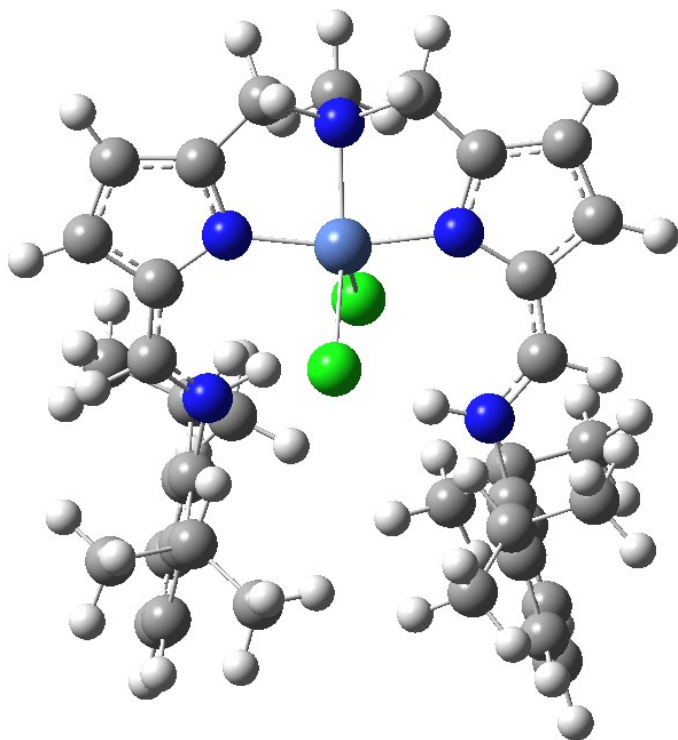

**Figure S20.** Optimized geometry of complex **8**.



E = -1912.307156 hartree

The atomic coordinates of complex **8**.

Ni -2.33584600 -0.62408400 -0.26994500  
Cl -0.66302500 -0.63838000 -1.93710100  
Cl -0.97043100 0.24253900 1.87016900  
N 1.03133000 -2.22630000 0.14488000  
N -2.11569400 -2.45115800 0.31613700  
N -4.29437300 -0.89133800 0.25521800  
N -2.96502600 1.10648900 -0.81098800  
N -0.18565700 2.40959300 -0.22970600  
C 2.93561000 0.05635000 3.06320600  
H 2.32530000 0.41211800 3.90274700  
H 3.98131300 0.01592400 3.39744800  
H 2.86105200 0.79426300 2.25566400  
C 2.41821500 -1.32901300 2.60093300  
H 1.35888800 -1.19388500 2.35989600  
C 2.52361300 -2.36085800 3.75626800  
H 2.11729100 -3.33895500 3.46522400  
H 3.56780600 -2.51177900 4.06310000  
H 1.95948700 -2.00746800 4.62889700  
C 3.15856300 -1.82279800 1.35347500  
C 4.57054200 -1.87971000 1.34783100  
H 5.11820500 -1.57727200 2.23657000  
C 5.27535600 -2.30166400 0.21163600  
H 6.36248800 -2.33280000 0.22809100  
C 4.58246000 -2.67746300 -0.95206200  
H 5.14138400 -2.99376400 -1.82789100  
C 3.17416300 -2.65228800 -0.99671000  
C 3.10460400 -2.73541200 -3.56777600  
H 2.45377600 -2.99442200 -4.41265300  
H 3.30166800 -1.65773300 -3.60926500  
H 4.05583300 -3.26513900 -3.71183200  
C 2.41437400 -3.12951300 -2.24077200  
H 1.42358900 -2.66035400 -2.24436000  
C 2.20212800 -4.66852700 -2.17926400  
H 1.63104100 -5.00916100 -3.05283600  
H 3.16604500 -5.19533800 -2.17133600

H 1.64795000 -4.96343400 -1.27927100  
C 2.48480500 -2.23180100 0.17407200  
C 0.29846000 -3.16075300 0.73967900  
H 0.86243700 -3.94078700 1.24734800  
C -1.09967800 -3.30420900 0.78812100  
C -1.71146300 -4.47284500 1.35787800  
H -1.17431800 -5.30366000 1.79822700  
C -3.09645800 -4.33079800 1.22539200  
H -3.86628100 -5.01981800 1.54423500  
C -3.29724600 -3.07557400 0.58636500  
C -4.55759400 -2.37189600 0.18576700  
H -4.82047700 -2.62418200 -0.85002200  
H -5.40464600 -2.65656200 0.82661600  
C -4.48741800 -0.37122800 1.65135800  
H -3.81067900 -0.89698800 2.32735300  
H -4.22334800 0.68699600 1.68060700  
H -5.53361400 -0.51164200 1.96803700  
C -5.09051600 -0.09641400 -0.74756700  
H -6.09048200 0.14956300 -0.35883500  
H -5.22285600 -0.71634000 -1.64396500  
C -4.30126400 1.13667900 -1.07561200  
C -4.68440100 2.36720800 -1.67729300  
H -5.68198000 2.65185000 -1.98210800  
C -3.50829900 3.12079900 -1.78966800  
H -3.40708400 4.12431900 -2.18383000  
C -2.44239900 2.34301200 -1.22349400  
C -1.15682900 2.87485300 -1.00717700  
H -0.94797800 3.81777100 -1.50946600  
C 1.09431200 3.08249800 -0.09541100  
C 2.00287800 3.08547400 -1.18586300  
C 3.22049200 3.78284700 -1.01833900  
H 3.93618100 3.80677500 -1.83612700  
C 3.52864300 4.42617600 0.18803800  
H 4.47459500 4.95179300 0.29714700  
C 2.62063900 4.38796100 1.26027400  
H 2.87411800 4.88451300 2.19206200  
C 1.38516300 3.72106800 1.14301700  
C 1.00144900 3.72500600 3.68871300  
H 0.21628000 3.61933700 4.44806100  
H 1.68869700 2.87744800 3.79429700

H 1.55286100 4.64853800 3.91229600  
C 0.35906500 3.75212800 2.28255800  
H -0.27091900 2.85832800 2.20870600  
C -0.56169200 4.99618200 2.13323300  
H -1.31979100 5.00454200 2.92744900  
H 0.02061900 5.92521200 2.20416000  
H -1.08538800 4.99730800 1.16877100  
C 1.53069200 3.36502600 -3.67284300  
H 1.30013700 2.82778400 -4.60192200  
H 0.70701900 4.06338700 -3.47237500  
H 2.43764200 3.96130100 -3.84139500  
C 1.72604800 2.35878100 -2.50709800  
H 0.80810400 1.77152700 -2.40766600  
C 2.85246300 1.34908100 -2.84522800  
H 2.58843300 0.79255600 -3.75372700  
H 3.81293200 1.85086400 -3.02361400  
H 2.99080700 0.62688200 -2.03183200  
H 0.55020900 -1.50793900 -0.42676000  
H -0.37284000 1.58097400 0.38378300

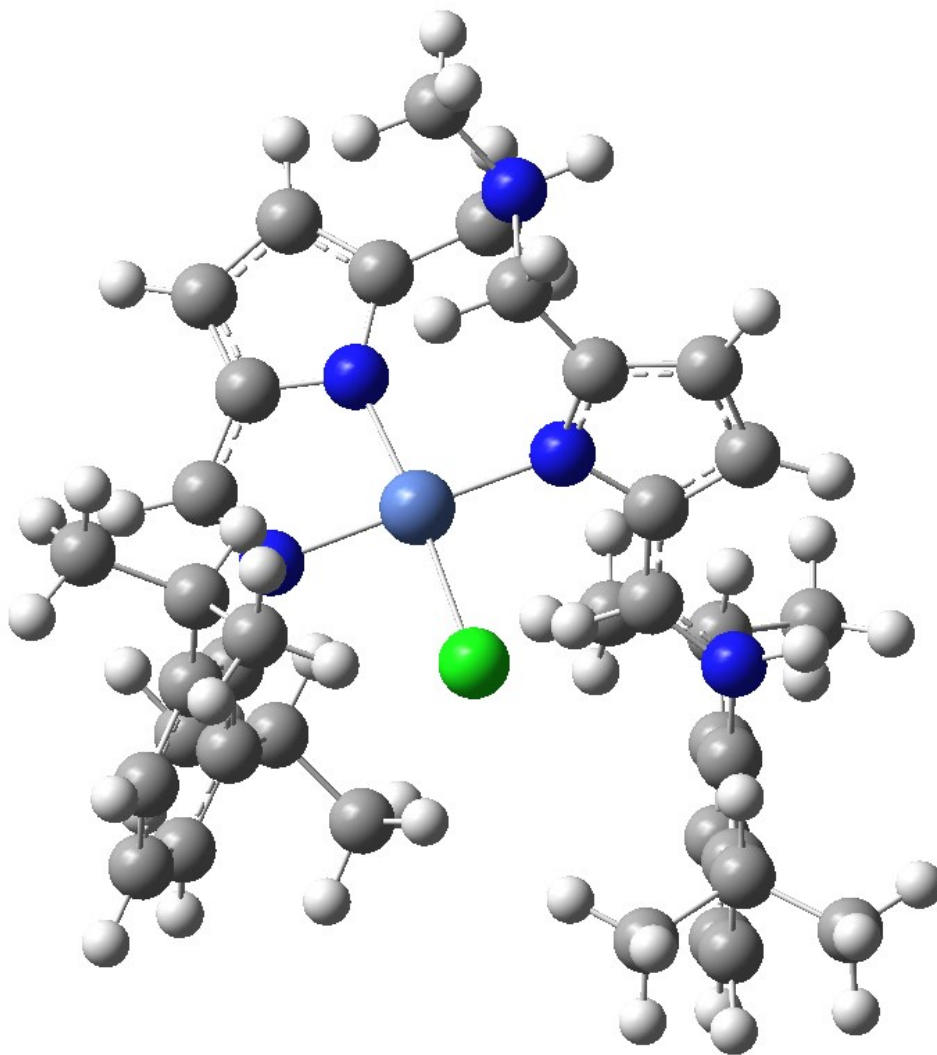

**Figure S21.** Optimized geometry of model complex I.

E = -1897.096184 hartree

The atomic coordinates of model complex I.

```
C 1.53627100 2.66109200 1.92508100
H 1.76992700 2.34695500 0.90052700
H 2.12984200 2.05502900 2.62329300
H 1.85900400 3.70344000 2.03875800
C 0.02293800 2.49812200 2.22104500
H -0.20556000 1.42707400 2.15141000
C -0.30937100 2.95249100 3.66722800
H -1.36780500 2.78760100 3.90858900
```

H -0.10243300 4.02180500 3.80183900  
H 0.29703700 2.39787100 4.39552700  
C -0.83277400 3.24004300 1.18904200  
C -0.63112100 4.61817900 0.97021000  
H 0.12213000 5.14757600 1.54809500  
C -1.38495300 5.31754600 0.01517900  
H -1.21814600 6.38093600 -0.13638700  
C -2.34795400 4.64234100 -0.75063000  
H -2.91590900 5.19003100 -1.49809900  
C -2.58740900 3.26517500 -0.56885600  
C -1.83317900 2.58901800 0.42340800  
C -3.35641700 2.73704100 -2.94140300  
H -4.08066900 2.16201600 -3.53451200  
H -2.34679100 2.39357300 -3.19372900  
H -3.44580300 3.78827300 -3.24277800  
C -3.63576200 2.55111400 -1.42785800  
H -3.57245100 1.47534300 -1.22077700  
C -5.07186800 3.01550200 -1.06511800  
H -5.81494300 2.48002900 -1.67106700  
H -5.19789200 4.08946600 -1.25255700  
H -5.29938400 2.83556100 -0.00574600  
C -2.99593400 0.89080100 1.62553000  
H -3.49391100 1.67107800 2.19784100  
C -3.26531800 -0.49341900 1.84711200  
C -4.11503200 -1.20414100 2.72139400  
H -4.76598700 -0.78336900 3.47509700  
C -3.93129400 -2.57092000 2.41155400  
H -4.40642100 -3.41628000 2.89278900  
C -2.97320900 -2.64138800 1.36476700  
C -2.48092100 -3.88785400 0.72543500  
H -2.75672500 -4.76335200 1.32052200  
H -1.40224600 -3.88683700 0.55753700  
C -4.61698500 -4.31486500 -0.63209300  
H -5.00134900 -4.47105600 -1.64347100  
H -5.05318500 -3.41521700 -0.19571800  
H -4.85656700 -5.17731800 -0.00458900  
C -2.71035600 -3.03213900 -1.70738000  
H -3.11510400 -3.34797600 -2.67397700  
H -3.20882700 -2.11934300 -1.37811100  
C -1.22698400 -2.88824500 -1.74095300

C -0.30464400 -3.72561800 -2.43815000  
H -0.55358500 -4.52773500 -3.12129300  
C 0.97783100 -3.28182800 -2.09316100  
H 1.91408600 -3.70363400 -2.43581300  
C 0.80556800 -2.18573000 -1.19249300  
C 1.78671600 -1.36115000 -0.59171500  
H 1.48697200 -0.64077700 0.16022000  
C 4.10204400 -0.58718200 -0.21502800  
C 3.65623500 2.28778600 -2.45091000  
H 3.33606300 2.50599200 -3.47722900  
H 4.40625000 3.03678600 -2.16711800  
H 2.78520200 2.40356500 -1.79581800  
C 4.23197500 0.84896300 -2.37085100  
H 3.42296900 0.17421900 -2.67824900  
C 5.40675700 0.66347800 -3.36885800  
H 5.06926600 0.87026900 -4.39209500  
H 5.80959100 -0.35786100 -3.34050500  
H 6.23145300 1.35143500 -3.14452800  
C 4.66158300 0.49566100 -0.94249000  
C 5.65091100 1.26505400 -0.29665200  
H 6.10089100 2.10390000 -0.81993400  
C 6.05425500 0.97125600 1.01515900  
H 6.81441100 1.58066200 1.49677600  
C 5.48368700 -0.10773900 1.70720400  
H 5.81345700 -0.32683900 2.71898500  
C 4.49991900 -0.92160700 1.10645200  
C 5.04676800 -3.10169500 2.31020800  
H 5.61735200 -3.45751600 1.44328000  
H 4.60984100 -3.97311300 2.81454000  
H 5.75397800 -2.63594700 3.00713300  
C 3.92918300 -2.11227600 1.88671400  
H 3.24256400 -2.66937200 1.23699100  
C 3.11758300 -1.63861000 3.12261800  
H 2.29637600 -0.96808800 2.83574900  
H 3.75609500 -1.09572400 3.83037100  
H 2.68934000 -2.49982700 3.65137000  
N -2.12187400 1.18497600 0.68777200  
N -2.55951800 -1.36629800 1.02118600  
N -3.11318200 -4.14042200 -0.69246300  
H -2.69191600 -5.01518200 -1.03605200

N -0.56505500 -1.96235200 -0.98591000  
N 3.08564600 -1.40047400 -0.87840400  
H 3.39957400 -1.99932700 -1.64008700  
Cl -0.07178000 0.88537700 -1.50660900  
Ni -1.35265500 -0.39692000 -0.16158500

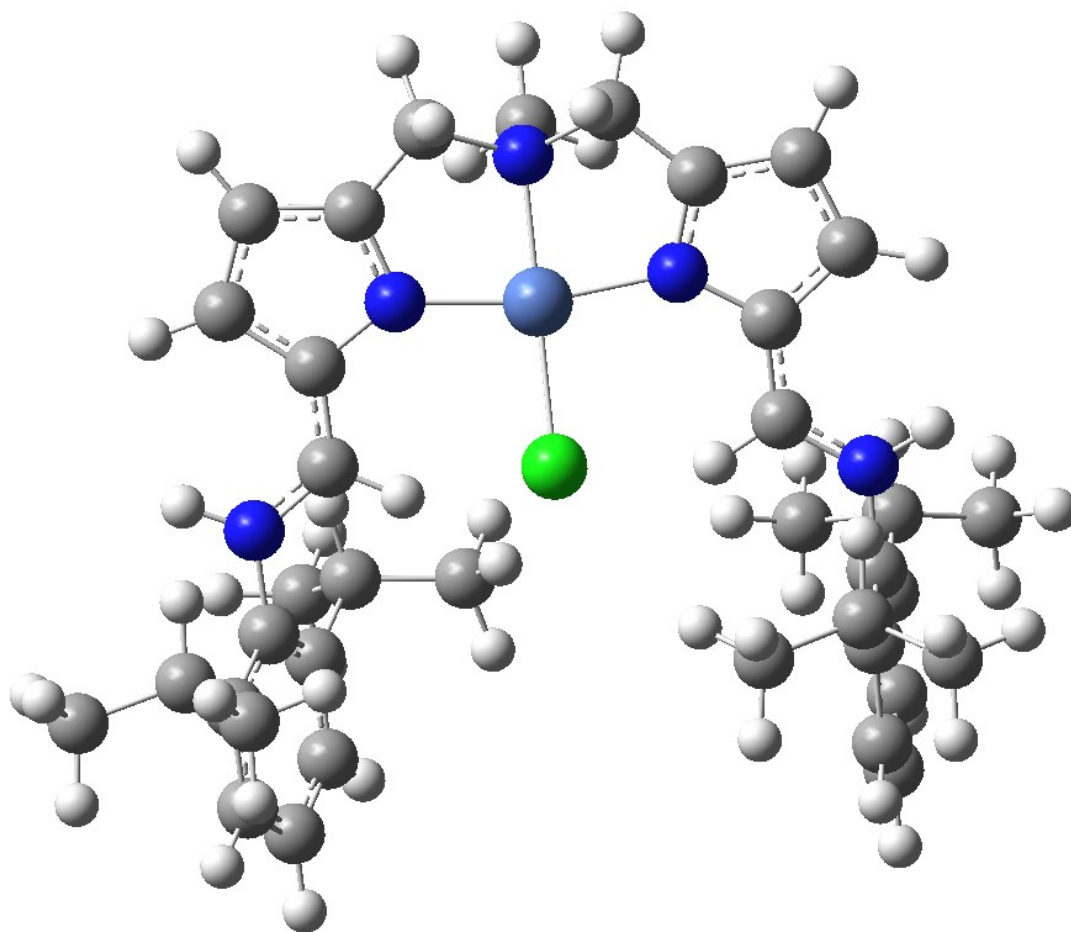

**Figure S22.** Optimized geometry of model complex **II**.

E = -1897.123576 hartree

The atomic coordinates of model complex **II**.

|    |             |             |             |
|----|-------------|-------------|-------------|
| Cl | 0.06408100  | 0.40832600  | -1.02386300 |
| N  | -4.15691000 | -0.30948200 | -0.28262600 |

|   |             |             |             |
|---|-------------|-------------|-------------|
| N | -1.93299500 | 2.68497400  | -0.30785200 |
| N | -0.07581800 | 4.43369900  | 0.30557200  |
| N | 1.89429800  | 2.72455800  | -0.01434100 |
| N | 4.15132200  | -0.22667200 | 0.30870500  |
| C | -4.86864200 | -2.31954100 | -3.76662700 |
| H | -4.78454900 | -1.78505000 | -4.72128600 |
| H | -4.77519400 | -3.39199500 | -3.97799300 |
| H | -5.87446300 | -2.14466900 | -3.36352300 |
| C | -3.76758600 | -1.83484200 | -2.78648800 |
| H | -3.89318900 | -0.75139900 | -2.66954800 |
| C | -2.35293800 | -2.06961700 | -3.38141900 |
| H | -1.56957600 | -1.67213200 | -2.72507800 |
| H | -2.16057100 | -3.13924800 | -3.53455100 |
| H | -2.26566200 | -1.57022800 | -4.35477300 |
| C | -3.90960700 | -2.50088500 | -1.41334000 |
| C | -3.85416200 | -3.90728600 | -1.31107800 |
| H | -3.70498300 | -4.50202400 | -2.20794100 |
| C | -3.99354000 | -4.55013300 | -0.07177000 |
| H | -3.95018800 | -5.63487100 | -0.01737400 |
| C | -4.19435300 | -3.79951700 | 1.09715100  |
| H | -4.30649500 | -4.31153000 | 2.04902400  |
| C | -4.25380900 | -2.39108900 | 1.05369900  |
| C | -5.80650800 | -1.98701900 | 3.03629700  |
| H | -5.96695900 | -1.36921800 | 3.92908400  |
| H | -6.66213700 | -1.84578400 | 2.36379500  |
| H | -5.80327500 | -3.03672000 | 3.35483200  |
| C | -4.47155200 | -1.59896100 | 2.34761300  |
| H | -4.53118000 | -0.53131700 | 2.10101900  |
| C | -3.27595200 | -1.77734400 | 3.32164600  |
| H | -3.42709000 | -1.17240000 | 4.22494400  |
| H | -3.17172100 | -2.82430500 | 3.63302100  |
| H | -2.32999700 | -1.47138400 | 2.85554200  |
| C | -4.09984900 | -1.76856900 | -0.21249400 |
| C | -3.07620300 | 0.48010600  | -0.25270300 |
| H | -2.11486900 | -0.01841100 | -0.17855700 |
| C | -3.10060700 | 1.88205000  | -0.33550800 |
| C | -4.24095000 | 2.75127000  | -0.42166700 |
| H | -5.28070300 | 2.45045600  | -0.45651000 |
| C | -3.76967700 | 4.06732300  | -0.43553400 |
| H | -4.35601500 | 4.97377700  | -0.48985300 |



|   |             |             |             |
|---|-------------|-------------|-------------|
| C | -2.35169800 | 3.97922000  | -0.36350900 |
| C | -1.29180300 | 5.03742200  | -0.35975900 |
| H | -1.01842300 | 5.31590800  | -1.38519100 |
| H | -1.61492900 | 5.94891300  | 0.16079400  |
| C | -0.20195500 | 4.50408000  | 1.80746900  |
| H | -1.11484700 | 3.99214900  | 2.11931000  |
| H | 0.65892500  | 4.01330700  | 2.26670400  |
| H | -0.24147300 | 5.55278500  | 2.13435000  |
| C | 1.22061300  | 5.06498200  | -0.14847400 |
| H | 1.43469300  | 5.97963600  | 0.42039600  |
| H | 1.11454700  | 5.34378700  | -1.20434300 |
| C | 2.28779500  | 4.02794600  | 0.01938300  |
| C | 3.69432100  | 4.14523500  | 0.19469400  |
| H | 4.26065900  | 5.06392700  | 0.25534300  |
| C | 4.18561500  | 2.83858200  | 0.27305500  |
| H | 5.22181100  | 2.55915800  | 0.41830100  |
| C | 3.06777500  | 1.94587300  | 0.14627700  |
| C | 3.06239600  | 0.54170700  | 0.17902500  |
| H | 2.11448100  | 0.02611900  | 0.06479100  |
| C | 4.12947600  | -1.68311700 | 0.35843300  |
| C | 3.52107400  | -2.33566200 | 1.46430600  |
| C | 3.52034700  | -3.74694000 | 1.46070500  |
| H | 3.05932100  | -4.28168000 | 2.28648200  |
| C | 4.11917000  | -4.47273600 | 0.42042700  |
| H | 4.11208400  | -5.55927400 | 0.44447800  |
| C | 4.73062000  | -3.80028800 | -0.64888100 |
| H | 5.19061800  | -4.37377500 | -1.44885200 |
| C | 4.74336900  | -2.39219600 | -0.70807600 |
| C | 6.89531700  | -2.02489500 | -2.02851500 |
| H | 7.34206600  | -1.47397900 | -2.86577100 |
| H | 7.44207100  | -1.76122300 | -1.11369600 |
| H | 7.05364100  | -3.09464700 | -2.21269900 |
| C | 5.38478700  | -1.69024000 | -1.91077800 |
| H | 5.29669500  | -0.60371600 | -1.77961800 |
| C | 4.63480300  | -2.03847300 | -3.22492200 |
| H | 5.07807800  | -1.49576100 | -4.06937300 |
| H | 4.69730700  | -3.11124800 | -3.44605300 |
| H | 3.57336900  | -1.76825000 | -3.16214500 |
| C | 1.34669500  | -1.79007600 | 2.67203200  |
| H | 0.90601900  | -1.22871400 | 3.50658000  |

|    |             |             |             |
|----|-------------|-------------|-------------|
| H  | 0.87755400  | -1.44992100 | 1.73970700  |
| H  | 1.09038400  | -2.84842600 | 2.80726500  |
| C  | 2.88688400  | -1.59056000 | 2.64566200  |
| H  | 3.07766300  | -0.51637300 | 2.53483600  |
| C  | 3.52030100  | -2.01742500 | 3.99574200  |
| H  | 3.09687000  | -1.42309900 | 4.81566000  |
| H  | 3.32591700  | -3.07369600 | 4.21837100  |
| H  | 4.60745400  | -1.87026100 | 3.99259800  |
| H  | -5.07813600 | 0.11309500  | -0.37888400 |
| H  | 5.06496000  | 0.21849900  | 0.35831800  |
| Ni | -0.01317900 | 2.51406500  | -0.22231800 |

Energy of Chloride anion = -15.11520744

The difference in energy between complex 8 and model complex I =  $E(8) - [E(I)+E(Cl)]$

$E(8)$  = energy of complex 8 = -1912.307156 hartree

$E(I)$  = energy of model complex I = -1897.096184 hartree

$E(Cl)$  = energy of chloride = -15.11520744

the difference in energy = 0.09576456 hartree = 60.09 kcal/mol.

The difference in energy between complex 8 and model complex II =  $E(8) - [E(II)+E(Cl)]$

$E(8)$  = energy of complex 8 = -1912.307156 hartree

$E(II)$  = energy of model complex I = -1897.123576 hartree

$E(Cl)$  = energy of chloride = -15.11520744

the difference in energy = 0.06837256 hartree = 42.90 kcal/mol
